1 Surfactin production is not essential for pellicle and root-associated biofilm development

2 of *Bacillus subtilis*

3

4 Maude Thérien<sup>1,#</sup>, Heiko T. Kiesevalter<sup>2,#</sup>, Emile Auria<sup>1,3</sup>, Vincent Charron-Lamoureux

5 <sup>1</sup>, Mario Wibowo<sup>4</sup>, Gergely Maróti<sup>5</sup>, Ákos T. Kovács<sup>2,\*</sup>, Pascale B. Beauregard<sup>1,\*</sup>

6

7 <sup>1</sup> Centre SÈVE, Département de biologie, Faculté des Sciences, Université de

8 Sherbrooke, Sherbrooke, Canada

9 <sup>2</sup> Bacterial Interactions and Evolution Group, DTU Bioengineering, Technical University

10 of Denmark, Kgs Lyngby, Denmark

11 <sup>3</sup> Biology department, Ecole Normale Supérieure Paris-Saclay, Paris-Saclay University,

12 Cachan, France

13 <sup>4</sup> Natural Product Discovery Group, DTU Bioengineering, Technical University of

14 Denmark, Kgs Lyngby, Denmark

15 <sup>5</sup> Institute of Plant Biology, Biological Research Center of the Hungarian Academy of

16 Sciences, Szeged, Hungary

17 # Co-first authors

18 \* Co-corresponding authors

19

20 **Abstract**

21 Secondary metabolites have an important impact on the biocontrol potential of soil-  
22 derived microbes. In addition, various microbe-produced chemicals have been  
23 suggested to impact the development and phenotypic differentiation of bacteria,  
24 including biofilms. The non-ribosomal synthesized lipopeptide of *Bacillus subtilis*,  
25 surfactin, has been described to impact the plant promoting capacity of the bacterium.  
26 Here, we investigated the impact of surfactin production on biofilm formation of *B.*  
27 *subtilis* using the laboratory model systems; pellicle formation at the air-medium  
28 interface and architecturally complex colony development, in addition to plant root-  
29 associated biofilms. We found that the production of surfactin by *B. subtilis* is not  
30 essential for pellicle biofilm formation neither in the well-studied strain, NCIB 3610, nor  
31 in the newly isolated environmental strains, but lack of surfactin reduces colony  
32 expansion. Further, plant root colonization was comparable both in the presence or  
33 absence of surfactin synthesis. Our results suggest that surfactin-related biocontrol and  
34 plant promotion in *B. subtilis* strains are independent of biofilm formation.

35

36 **Keywords:** *Bacillus subtilis*, biofilm, surfactin, plant root colonization, pellicle

37



## 38 1. Introduction

39  
40 Several species from the “*Bacillus subtilis* complex” are well-characterized plant growth-  
41 promoting rhizobacteria (PGPRs), providing various beneficial activities for plants and  
42 inhibiting fungal and bacterial pathogens [1]. Many strains of *Bacillus subtilis*, *Bacillus*  
43 *amyloliquefaciens* and *Bacillus velezensis* are currently used in organic and traditional  
44 agriculture to prevent infection and/or increase yields of various crops [2–4]. These  
45 species are of particular interest because they can form stress-resistant endospores, a  
46 cell-type ideal for product formulation. Most PGPR *Bacillus spp.* also produce a wide  
47 range of bioactive molecules, such as lipopeptides, which directly influences plant growth  
48 and defence [5].

49  
50 Many of these molecules are synthesized by multienzyme-complexes called non-  
51 ribosomal peptide synthetases (NRPS) [6]. *B. subtilis* NCIB3610 possesses 3 NRPS  
52 clusters and one NRPS/polyketide synthetase (PKS) cluster, which is few compared to  
53 the bioactive molecule synthesis capacity of *B. velezensis* strains [1]. Bacillaene, a broad  
54 spectrum antibiotic, is synthesized by proteins encoded in 80 kB *pksA-S* cluster [7]. The  
55 *ppsA-E* encodes for the peptide synthetase responsible for the synthesis of plipastatin  
56 (fengycin family), a strong antifungal molecule [5,8], while the siderophore bacillibactin is  
57 synthesized by the product of the *dhbA-F* operon [9]. Finally, SrfAA-AD produces versatile  
58 molecules from the surfactin family [10].

59  
60 Surfactin molecules are composed of a heptapeptide, i.e. two acidic and five nonpolar  
61 amino acids, interlinked with a  $\beta$ -hydroxy fatty acid, and condensed in a cyclic lactone

62 right structure [10,11]. The amino acid sequence, the length, and the branching of the fatty  
63 acid moiety can vary in surfactin molecules produced by different *Bacillus* species, strains  
64 and/or growth conditions [12]. For example, on tomato roots *B. amyloliquefaciens* S499  
65 produces surfactin variants with C<sub>12</sub>, C<sub>13</sub>, C<sub>14</sub> and C<sub>15</sub> acyl chains, the last two composing  
66 more than 80% of total surfactins produced in these conditions [13]. Surfactin, as its name  
67 suggests, is an extremely powerful biosurfactant, and thus helps bacteria moving on solid  
68 surface [6,14–18]. These molecules are abundantly produced when *B. subtilis* colonizes  
69 plant roots, and they elicit the induce systemic resistance in plants [19–22].

70  
71 A strong link between biofilm formation and surfactin production was suggested for  
72 different *Bacillus* species. Mutations in the surfactin synthesis operon were reported to  
73 cause partial to severe biofilm defect *B. velezensis* FZB42 and *B. amyloliquefaciens*  
74 UMAF6614 [23,24]. Non-surfactin producer strains of UMAF6614 were also impaired in  
75 root colonization [25]. Under specific laboratory growth conditions (i.e. exponentially  
76 growing cells inoculated into lysogeny broth medium), surfactin was shown to trigger  
77 biofilm formation in *B. subtilis* via a pore-forming activity, which causes intracellular  
78 potassium leakage sensed by KinC that in turns activate the genetic pathway responsible  
79 for biofilm formation [26]. This “quorum-sensing like” activity was demonstrated in the  
80 model strain NCIB3610. Similarly to reports in *B. velezensis* and *B. amyloliquefaciens*, a  
81 surfactin deletion mutant of *B. subtilis* 6051 was shown to be defective for biofilm formation  
82 and root colonization [19]. However, a different study showed that biofilms formed by *B.*  
83 *subtilis* tomato rhizoplane isolates had comparable dry weight among wild-type and  
84 surfactin mutants [27]. Finally, deletion of *sfp*, which is known to be involved in the

85 production of surfactin since it encodes for a 4' phosphopantetheinyl transferase that  
86 activates the peptidyl carrier protein domains from the NRPS machinery, impairs biofilm  
87 formation in *B. subtilis* 3610 [28]. Since *sfp* mutation is defective for the synthesis of all  
88 NRP-derived molecules (surfactin, bacillibactin, plipastatin and bacillaene), this impair in  
89 biofilm formation could be due to a defect in other biosynthetic pathways than surfactin  
90 [14]. These conflicting reports and recent results in our laboratories lead us to revisit the  
91 importance of surfactin for biofilm formation of *B. subtilis in vitro* and *on planta*.

92

## 93 2. Material and Methods

### 94 2.1 Strains, media, and chemicals

95 Strains used in the study are listed in Table S1. For routine growth, cells were propagated  
96 on lysogeny broth (LB; Luria-Bertani or Lenox broth) medium. When necessary, antibiotics  
97 were used at the following concentrations: MLS (1  $\mu\text{g mL}^{-1}$  erythromycin, 25  $\mu\text{g mL}^{-1}$   
98 lincomycin); spectinomycin (100  $\mu\text{g mL}^{-1}$ ); chloramphenicol (5  $\mu\text{g mL}^{-1}$ ) and kanamycin  
99 (10  $\mu\text{g mL}^{-1}$ ). New *B. subtilis* isolates were obtained from 5 sampling sites in Germany  
100 and Denmark (see Table S1 for coordinates) by selecting for spore formers in the soil.  
101 Soil samples were mixed with 0.9% saline solution, vortexed on a rotary shaker for 2 min,  
102 incubated at 80°C for 25 min and serially diluted on 2×SG medium solidified with 1.5%  
103 agar [29]. Highly structured colonies were targeted and isolation of *B. subtilis* strains was  
104 confirmed using 16S sequencing followed by whole genome [30]. New isolates and their  
105 *srfAC::spec* derivatives (*srfAC::spec* marker was transferred from DS1122 [31]) were  
106 labeled with constitutively expressed *gfp* from  $P_{\text{hyperspank}}$  using phyGFP plasmids that  
107 integrates into the *amyE* locus [32].

354 **Table S1. Strains used in this study**

355

| <b><i>B. subtilis</i></b><br><b>strains</b> | <b>Characteristics</b>                                                                                      | <b>Reference</b>         |
|---------------------------------------------|-------------------------------------------------------------------------------------------------------------|--------------------------|
| NCIB3610                                    | WT/Undomesticated strain                                                                                    | Lab stock                |
| SSB46                                       | 3610 <i>srfAA::erm</i>                                                                                      | [28]                     |
| MT529                                       | 3610 <i>srfAA::erm</i> (new transduction in 3610 background)                                                | This study               |
| MT476                                       | 3610 <i>srfAA::kan</i>                                                                                      | This study               |
| PB174                                       | <i>amyE::P<sub>tapA</sub>-lacZ</i>                                                                          | Lab stock                |
| MT644                                       | <i>sfp::erm</i>                                                                                             | BKE03569<br>[47] in 3610 |
| MT619                                       | <i>srfAA::kan amyE::P<sub>tapA</sub>-lacZ</i> (Spec <sup>R</sup> )                                          | This study               |
| MT650                                       | <i>sfp::erm amyE::P<sub>tapA</sub>-lacZ</i> (Spec <sup>R</sup> )                                            | This study               |
| MT607                                       | <i>amyE::P<sub>eps</sub>-lacZ</i> (Chl <sup>R</sup> )                                                       | Lab stock                |
| MT613                                       | <i>srfAA::kan amyE::P<sub>eps</sub>-lacZ</i> (Chl <sup>R</sup> )                                            | This study               |
| MT651                                       | <i>sfp::erm amyE::P<sub>eps</sub>-lacZ</i> (Chl <sup>R</sup> )                                              | This study               |
| CA018                                       | <i>amyE::P<sub>tapA</sub>-yfp</i> (Spec <sup>R</sup> )                                                      | [48]                     |
| MT649                                       | <i>srfAA::kan amyE::P<sub>tapA</sub>-yfp</i> (Spec <sup>R</sup> )                                           | This study               |
| MB8_B1                                      | <i>B. subtilis</i> soil isolate from sample site 55.843861, 12.424770                                       | This study               |
| MB9_B1                                      | <i>B. subtilis</i> soil isolate from sample site 55.843861, 12.424770                                       | This study               |
| P5_B1                                       | <i>B. subtilis</i> soil isolate from sample site 55.788800, 12.558300                                       | This study               |
| P8_B1                                       | <i>B. subtilis</i> soil isolate from sample site 55.795200, 12.580600                                       | This study               |
| P9_B1                                       | <i>B. subtilis</i> soil isolate from sample site 55.791200, 12.575100                                       | This study               |
| 75                                          | <i>B. subtilis</i> soil isolate from sample site 50.725876, 10.916218                                       | This study               |
| DTUB27                                      | MB8_B1 <i>amyE::P<sub>hyperspank</sub>-gfp</i> (Chl <sup>R</sup> )                                          | This study               |
| DTUB30                                      | MB9_B1 <i>amyE::P<sub>hyperspank</sub>-gfp</i> (Chl <sup>R</sup> )                                          | This study               |
| DTUB38                                      | P5_B1 <i>amyE::P<sub>hyperspank</sub>-gfp</i> (Chl <sup>R</sup> )                                           | This study               |
| DTUB40                                      | P8_B1 <i>amyE::P<sub>hyperspank</sub>-gfp</i> (Chl <sup>R</sup> )                                           | This study               |
| DTUB43                                      | P9_B1 <i>amyE::P<sub>hyperspank</sub>-gfp</i> (Chl <sup>R</sup> )                                           | This study               |
| TB731                                       | 75 <i>amyE::P<sub>hyperspank</sub>-gfp</i> (Chl <sup>R</sup> )                                              | This study               |
| DS1122                                      | 3610 <i>srfAC::tn10</i> (Spec <sup>R</sup> )                                                                | [31]                     |
| DTUB68                                      | MB8_B1 <i>srfAC::tn10</i> (Spec <sup>R</sup> )                                                              | This study               |
| DTUB71                                      | MB9_B1 <i>srfAC::tn10</i> (Spec <sup>R</sup> )                                                              | This study               |
| DTUB79                                      | P5_B1 <i>srfAC::tn10</i> (Spec <sup>R</sup> )                                                               | This study               |
| DTUB80                                      | P8_B1 <i>srfAC::tn10</i> (Spec <sup>R</sup> )                                                               | This study               |
| DTUB82                                      | P9_B1 <i>srfAC::tn10</i> (Spec <sup>R</sup> )                                                               | This study               |
| DTUB89                                      | 75 <i>srfAC::tn10</i> (Spec <sup>R</sup> )                                                                  | This study               |
| DTUB146                                     | MB8_B1 <i>srfAC::tn10</i> (Spec <sup>R</sup> ); <i>amyE::P<sub>hyperspank</sub>-gfp</i> (Chl <sup>R</sup> ) | This study               |
| DTUB147                                     | MB9_B1 <i>srfAC::tn10</i> (Spec <sup>R</sup> ); <i>amyE::P<sub>hyperspank</sub>-gfp</i> (Chl <sup>R</sup> ) | This study               |
| DTUB148                                     | P5_B1 <i>srfAC::tn10</i> (Spec <sup>R</sup> ); <i>amyE::P<sub>hyperspank</sub>-gfp</i> (Chl <sup>R</sup> )  | This study               |
| DTUB149                                     | P8_B1 <i>srfAC::tn10</i> (Spec <sup>R</sup> ); <i>amyE::P<sub>hyperspank</sub>-gfp</i> (Chl <sup>R</sup> )  | This study               |
| DTUB150                                     | P9_B1 <i>srfAC::tn10</i> (Spec <sup>R</sup> ); <i>amyE::P<sub>hyperspank</sub>-gfp</i> (Chl <sup>R</sup> )  | This study               |
| DTUB145                                     | 75 <i>srfAC::tn10</i> (Spec <sup>R</sup> ); <i>amyE::P<sub>hyperspank</sub>-gfp</i> (Chl <sup>R</sup> )     | This study               |

108

109 All solvents used for HRMS and chromatography were VWR Chemicals LC-MS grade,  
110 while for metabolites extraction the solvents were HPLC grade (VWR Chemicals).  
111 Surfactin standard was purchased from Sigma-Aldrich (Cat. No. S3523).

112

## 113 2.2 Culture conditions

114 For pellicles assays, cells were pre-grown for 2 hours and diluted 1:100 in 3mL LB 3 times,  
115 and at the last incubation cells were grown until they reach an OD<sub>600</sub> between 0.3 and 0.6.  
116 OD<sub>600</sub> was then adjusted at 0.3 with LB, and 13.5 µL were used to inoculate 1mL of  
117 medium in a 24-well plates. Media used for these experiments were MSgg [28] and MSNc  
118 + Pectin (MSN: 5mM Potassium phosphate buffer pH7, 0.1M Mops pH7, 2mM MgCl<sub>2</sub>,  
119 0.05mM MnCl<sub>2</sub>, 1µM ZnCl<sub>2</sub>, 2 µM thiamine, 700 µM CaCl<sub>2</sub>, 0.2% NH<sub>4</sub>Cl; 0,5% cellobiose  
120 and 0,5% pectin (Sigma)). Incubation was done at 30°C. For pellicle assays of recent  
121 *B. subtilis* soil isolates and its mutant derivatives, three to four colonies were inoculated  
122 in 3 ml LB and incubated at 37°C with shaking at 225 rpm for 4 h. The OD<sub>600</sub> was adjusted  
123 to 1.5 and 1 % inoculum of the pre-grown culture was used to seed bacterial biofilms in  
124 MSgg [28] or MOLP [33] media at 30°C. For colony biofilms, one colony was inoculated  
125 in 3 mL LB and rolled for 3h at 37°C. The culture was adjusted to an OD<sub>600</sub> of 1, then 2µL  
126 were spotted on solidified (1.5% agar) MSgg media.

127

128 Col-0 *A. thaliana* ecotype was used throughout the study. In the Canadian laboratory,  
129 seeds were surface-sterilized with 70% ethanol followed by 0.3% sodium hypochlorite  
130 (v/v) and germinated on Murashige-Skoog medium (Sigma) 0.7% agar with 0.05%

131 glucose in a growth chamber at 25°C. Root colonization assay were performed using  
132 MSNg (MSN supplemented with 0.05% glycerol) as described in [34]. In Denmark,  
133 *Arabidopsis* seeds were surface sterilized using 2% (v/v) sodium hypochlorite with mixing  
134 on an orbital shaker for 20 min and then washed five times with sterile distilled water. The  
135 seeds were placed on pre-dried Murashige and Skoog (MS) basal salts mixture (2.2 g l<sup>-1</sup>,  
136 Sigma) containing 1% agar in an arrangement of approximately 20 seeds per plate at a  
137 minimum distance of 1 cm. After 3 days of incubation at 4°C, plates were placed at an  
138 angle of 65° in a plant chamber with a light regime of 16 h light (24°C)/8-h dark (21°C).  
139 After 6 days, homogenous seedlings ranging 0.8-1.2 cm in length were selected for root  
140 colonization assay. Seedlings were transferred into 48-well plates containing 270 µl of  
141 MSNg medium [34] per well. The wells were supplemented with 30 µl of exponentially  
142 growing bacterial culture diluted to OD<sub>600</sub> = 0.2. The sealed plates were incubated at a  
143 rotary shaker (90 rpm) at 30°C for 18 h. After the incubation, plants were washed three  
144 times with MSNg to remove non-attaching cells and then transferred to a glass slide for  
145 imaging using CLSM.

146

### 147 *2.3 Beta-galactosidase assays*

148 From pellicle biofilm assays, spent medium was cautiously removed from the wells. The  
149 pellicle was then collected in 1mL of Z-buffer (40 mM NaHPO<sub>4</sub>; 60 mM Na<sub>2</sub>HPO<sub>4</sub>; 1 mM  
150 MgSO<sub>4</sub>; 10 mM KCl) and transferred in a 1.5mL tube. The suspensions were sonicated  
151 with 1 second pulses (30% power) for 10 seconds total to break the biofilms, and OD<sub>600</sub>  
152 was measured. Then, 2-mercaptoethanol (final concentration of 38 mM) and freshly  
153 prepared lysozyme in Z-buffer (final concentration of 20 µg mL<sup>-1</sup>) were added.  
154 Suspensions were incubated for 30 min at 30°C, diluted and 100µL of an ONPG solution

155 (4 mg mL<sup>-1</sup> in Z-buffer with 38mM of 2-mercaptoethanol) were added. 250µL of Na<sub>2</sub>CO<sub>3</sub>  
156 1M were added when solutions started turning yellow, and the reaction time was recorded.  
157 The A<sub>420nm</sub> and OD<sub>550nm</sub> were measured for each solution, and the Miller Units were  
158 calculated using: Miller Units = 1000 x [(A<sub>420nm</sub> - 1.75 x OD<sub>550nm</sub>)] / (T<sub>min</sub> x V<sub>ml</sub> x OD<sub>600</sub>)

159

#### 160 *2.4 Microscopy*

161 To visualize bacteria on root surfaces in the Canadian laboratory, seedlings were  
162 examined with a Zeiss Axio Observer Z1 microscope equipped with a 20X/0.8 Plan-  
163 Apochromat objective, and whole root pictures were taken with a Zeiss AxioCam 506  
164 mono. Figure 3A presents representative images of the various mutant and time of  
165 colonization. The fluorescence signal was detected using a YFP filter (ex: 500/20, em:  
166 535/30) and a CFP filter for autofluorescence of the root (ex: 436/20, em: 480/40). All  
167 images were taken at the same exposure time, processed identically for compared image  
168 sets, and prepared for presentation using Zeiss Zen 2.0 software. Each image is  
169 representative of at least 12 root colonization assays performed in three independent  
170 experiments. Quantification was performed using CellProfiler 3.0 (cellprofiler.org) [35].

171

172 In Denmark, the washed plant roots were transferred to microscope slides and gently  
173 sealed with cover slips. Plant root colonization was analysed with a confocal laser  
174 scanning microscope (TCS SP8 (Leica) equipped with an argon laser and a Plan-  
175 Apochromat 63x/1.4 Oil objective). Fluorescent reporter excitation was performed at  
176 488 nm for green fluorescence, while the emitted fluorescence was recorded at  
177 520/23 nm. Single-layer images were acquired and processed with the software ImageJ



178 (National Institutes of Health). Each image is representative of 2 root colonization assays  
179 performed in two independent experiments.

180

### 181 *2.5 Chemical extraction of secondary metabolites from bacterial cultures*

182 Bacterial strains were cultured on MSgg agar plates for 3 days at 30 °C. An agar plug (6  
183 mm diameter) of each bacterial cultures was transferred to a vial and extracted with 1 mL  
184 of isopropanol:ethyl acetate (1:3, v/v) with 1% formic acid. The vials were placed in an  
185 ultrasonic bath at full effect for 60 min. Extracts were then transferred to new vials,  
186 evaporated to dryness under N<sub>2</sub>, and re-dissolved in 300 µL of methanol for further  
187 sonication over 15 min. After centrifugation at 13400 rpm for 3 min, the supernatants were  
188 transferred to new vials and subjected to ultrahigh-performance liquid chromatography-  
189 high resolution mass spectrometry (UHPLC-HRMS) analysis.

190

### 191 *2.6 UHPLC-HRMS analysis*

192 UHPLC-HRMS was performed on an Agilent Infinity 1290 UHPLC system equipped with  
193 a diode array detector. UV-visible spectra were recorded from 190 to 640 nm. Liquid  
194 chromatography of 1 µL extract was performed using an Agilent Poroshell 120 phenyl-  
195 hexyl column (2.1 × 150 mm, 2.7 µm) at 60 °C with acetonitrile and H<sub>2</sub>O, both buffered  
196 with 20 mM formic acid, as mobile phases. Initially, a linear gradient of 10% acetonitrile in  
197 H<sub>2</sub>O to 100% acetonitrile over 15 min was employed, followed by isocratic elution of 100%  
198 acetonitrile for 2 min. The gradient was returned to 10% acetonitrile in H<sub>2</sub>O in 0.1 min, and  
199 finally isocratic condition of 10% acetonitrile in H<sub>2</sub>O for 2.9 min, all at a flow rate of 0.35  
200 mL/min. MS detection was performed in positive ionization on an Agilent 6545 QTOF MS



201 equipped with an Agilent Dual Jet Stream electrospray ion source with a drying gas  
202 temperature of 250 °C, drying gas flow of 8 L/min, sheath gas temperature of 300 °C, and  
203 sheath gasflow of 12 L/min. Capillary voltage was set to 4000 V and nozzle voltage to 500  
204 V. MS data processing and analysis were performed using Agilent MassHunter Qualitative  
205 Analysis B.07.00.

206

### 207 *2.7 Genome re-sequencing*

208 Genomic DNA of 3610, SSB46 and MT529 were isolated using Bacterial and Yeast  
209 Genomic DNA kit (EURx). Re-sequencing was performed on an Illumina NextSeq  
210 instrument using V2 sequencing chemistry (2x150 nt). Base-calling was carried out with  
211 “bcl2fastq” software (v.2.17.1.14, Illumina). Paired-end reads were further analyzed in  
212 CLC Genomics Workbench Tool 9.5.1. Reads were quality-trimmed using an error  
213 probability of 0.05 (Q13) as the threshold. Reads that displayed  $\geq 80\%$  similarity to the  
214 reference over  $\geq 80\%$  of their read lengths were used in mapping. Quality-based SNP  
215 and small In/Del variant calling was carried out requiring  $\geq 10\times$  read coverage with  $\geq 25\%$   
216 variant frequency. Only variants supported by good quality bases ( $Q \geq 30$ ) on both  
217 strands were considered.

218

## 219 **3. Results**

220

### 221 *3.1 Absence of surfactin has no effect on pellicle formation of NCIB 3610*

222 To assess the importance of surfactin production for biofilm development, pellicle  
223 formation, a biofilm on the air-medium interface was first examine in liquid biofilm-inducing

224 medium, i.e. MSgg and MSNc + pectin. MSgg induces biofilm formation via iron availability  
225 and glutamate, while pectin, a plant-derived polysaccharide, is the main environmental  
226 cue inducing biofilm formation in MSNc + pectin [34]. Since both media present different  
227 cues for the bacterial cells, and that pectin was shown to strongly induce surfactin  
228 production [36], importance of this molecule for biofilm formation could vary according to  
229 the medium used. As shown in Fig. 1A, deletion of *srfAA*, and consequently absence of  
230 surfactin, does not visibly affect pellicle formation in either liquid media. Similarly, a strain  
231 deleted for *sfp*, which is defective for synthesis of all NRP-derived molecules, is also able  
232 to form pellicle in both media.

233  
234 Importantly, the 3610 *srfAA* deletion strain used here was newly created (harbouring a  
235 kanamycin resistant gene) and did not match the pellicle formation phenotype of the  
236 originally published laboratory stock, 3610 *srfAA::erm* (SSB46; [28]), the latter showing  
237 an important delay in pellicle formation (Fig. S1). When the *srfAA::erm* marker was re-  
238 introduced into 3610 by SPP1 phage transduction, the newly obtained *srfAA::erm* strain  
239 (MT529) displayed comparable pellicle development to 3610 and *srfAA::kan* strains.  
240 Consequently, the genomes of 3610, SSB46, and the newly created MT529 strains were  
241 re-sequenced. In addition to the *srfAA::erm* mutation, SSB46 strain contained six point  
242 mutations that did not exist the ancestral 3610 or the re-created MT529 strain (see Table  
243 S2). However, deletion mutants of the SNP harbouring genes combined with *srfAA::kan*  
244 did not recapitulate the important defect observed with SSB46 strain (Fig. S1), suggesting  
245 that the mutation causing the defect is not a loss-of-function or that certain combination  
246 of SNPs are responsible for the observed phenotype of SSB46 strain.

247

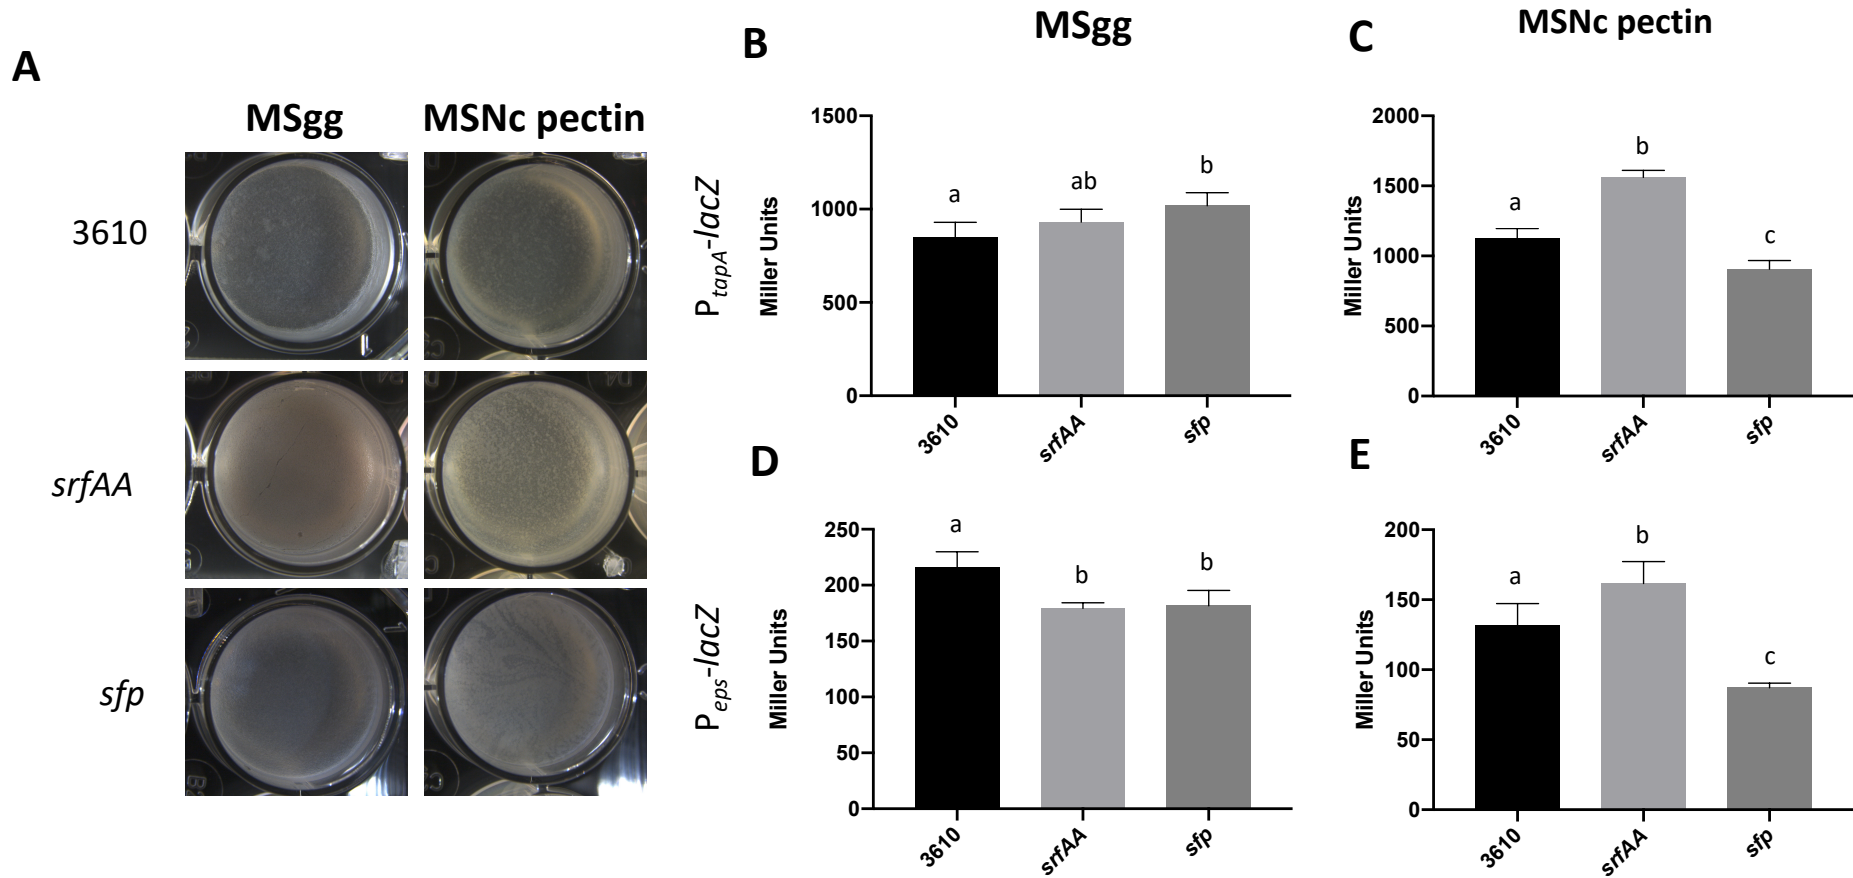

**Figure 1.** Pellicle formation is mildly affected by *srfAA* or *sfp* deletion. (A) Top-down view of pellicle assay in which the indicated mutants were incubated for 24 h at 30 °C in MSgg or in MSNc + pectin. Results are representative of three experiments. (B-D)  $\beta$ -galactosidase activities of WT (3610), *srfAA* or *sfp* mutant harbouring the  $P_{tapA}$ -lacZ reporter (B and C) or the  $P_{eps}$ -lacZ reporter (D and E). Cells were grown in standing MSgg (B and D) or MSNc + pectin (C and E) pellicles for 20 hours. Values represent the mean of five technical replicates, and the experiments are representative of at least three independent biological replicates. Error bars represent standard deviation, and letters represent =  $P < 0.05$ .

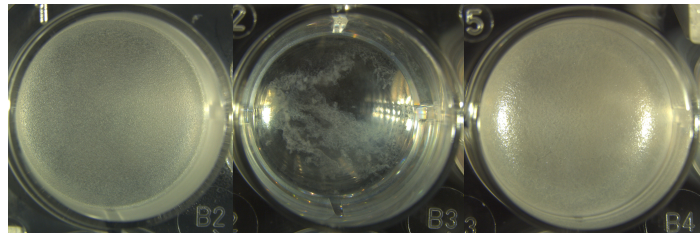

3610

*srfAA::mIs*  
(SSB34)

*srfAA::kan*

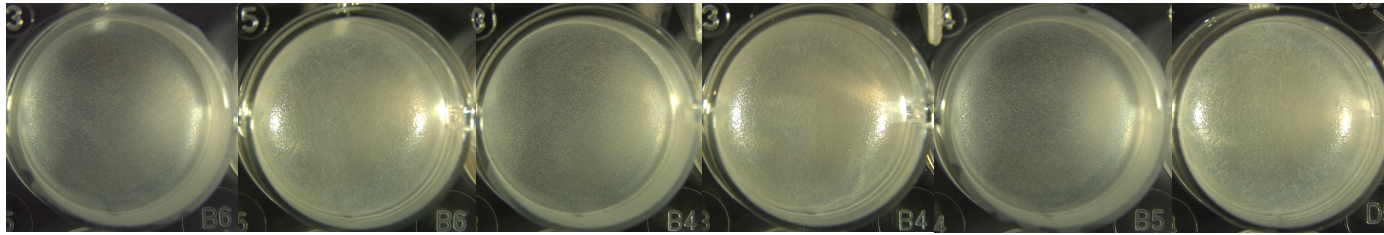

*phoD::erm*

*phoD::erm*  
*srfAA::kan*

*fliP::erm*

*fliP::erm*  
*srfAA::kan*

*ybfO::erm*

*ybfO::erm*  
*srfAA::kan*

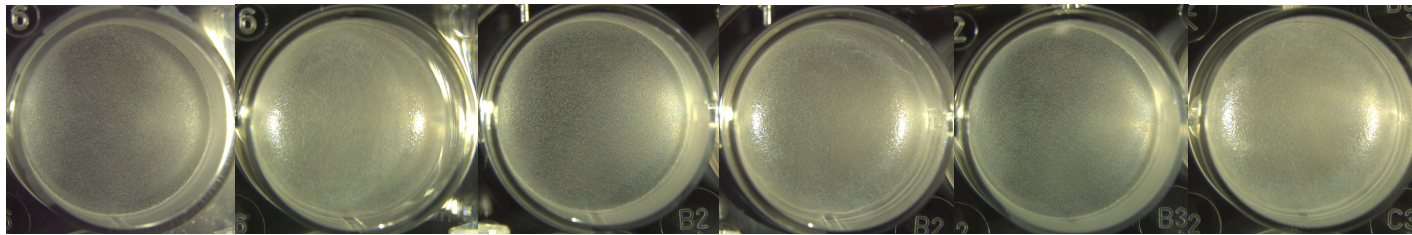

*yceC::erm*

*yceC::erm*  
*srfAA::kan*

*yceJ::erm*

*yceJ::erm*  
*srfAA::kan*

*ycgT::erm*

*ycgT::erm*  
*srfAA::kan*

**Fig S1.** Pellicle formation with deletion mutants identified as containing mutations in strain SSB46. Pellicles were formed in MSgg for 24 h at 30 °C. Pictures are representative of biological duplicates.

248 Importance of surfactin and *sfp* for activation of the two main operons involved in  
249 biosynthesis of the extracellular matrix, i.e. *tapA-sfpW-tasA* and *epsA-O*, was further  
250 examined using transcriptional *lacZ* fusions. As shown in Fig. 1B and D, absence of  
251 surfactin or deletion of *sfp* have little to no effect on *tapA* transcription, and slightly  
252 decreases *epsA-O* transcription in MSgg. In MSNc pectin, absence of surfactin actually  
253 increases *tapA* and *epsA-O* transcription (Fig. 1C), which also correlates with the more  
254 vigorous aspect of pellicles (see Fig.1A). In the same medium, absence of *sfp* impairs  
255 transcription of both biofilm operons. In summary, in liquid media *srfAA* or *sfp* deletion has  
256 only mild impacts on pellicle biofilm formation in *B. subtilis* 3610.

257

### 258 3.2 Deletion of *sfp* and *srfAA* alters colony structure

259 Biofilm strength can also be evaluated using the complex architecture of colony biofilms  
260 growing on solid biofilm-inducing media. Since surfactin is a biosurfactant [17,37], its  
261 absence might have more severe effect on solid media as observed for sliding, a matrix  
262 dependent colony expansion [17]. Indeed, as shown in Fig. 2A, colonies of *srfAA* show  
263 less spreading on solid MSgg and MSNc pectin, but are still very wrinkly. These wrinkles  
264 are likely composed mostly of proteinaceous (*TasA*) fibres, since expression of  $P_{eps}$  is  
265 drastically reduced by absence of surfactin, while  $P_{tapA}$  is not affected (Fig. 2B).  
266 Interestingly, the *sfp* mutant produces small, flat colonies in both media. This strain also  
267 has significantly reduced LacZ activity for both biofilm reporters ( $P_{tapA}$  and  $P_{eps}$ ) and media,  
268 which correspond to the flat phenotype of the colonies. While calculation of the miller units  
269 includes normalization for cell number ( $OD_{600}$ ), this lack of biofilm gene expression could  
270 also be attributable to lack of cell growth and incapacity to reach the cell density required  
271 for biofilm formation.



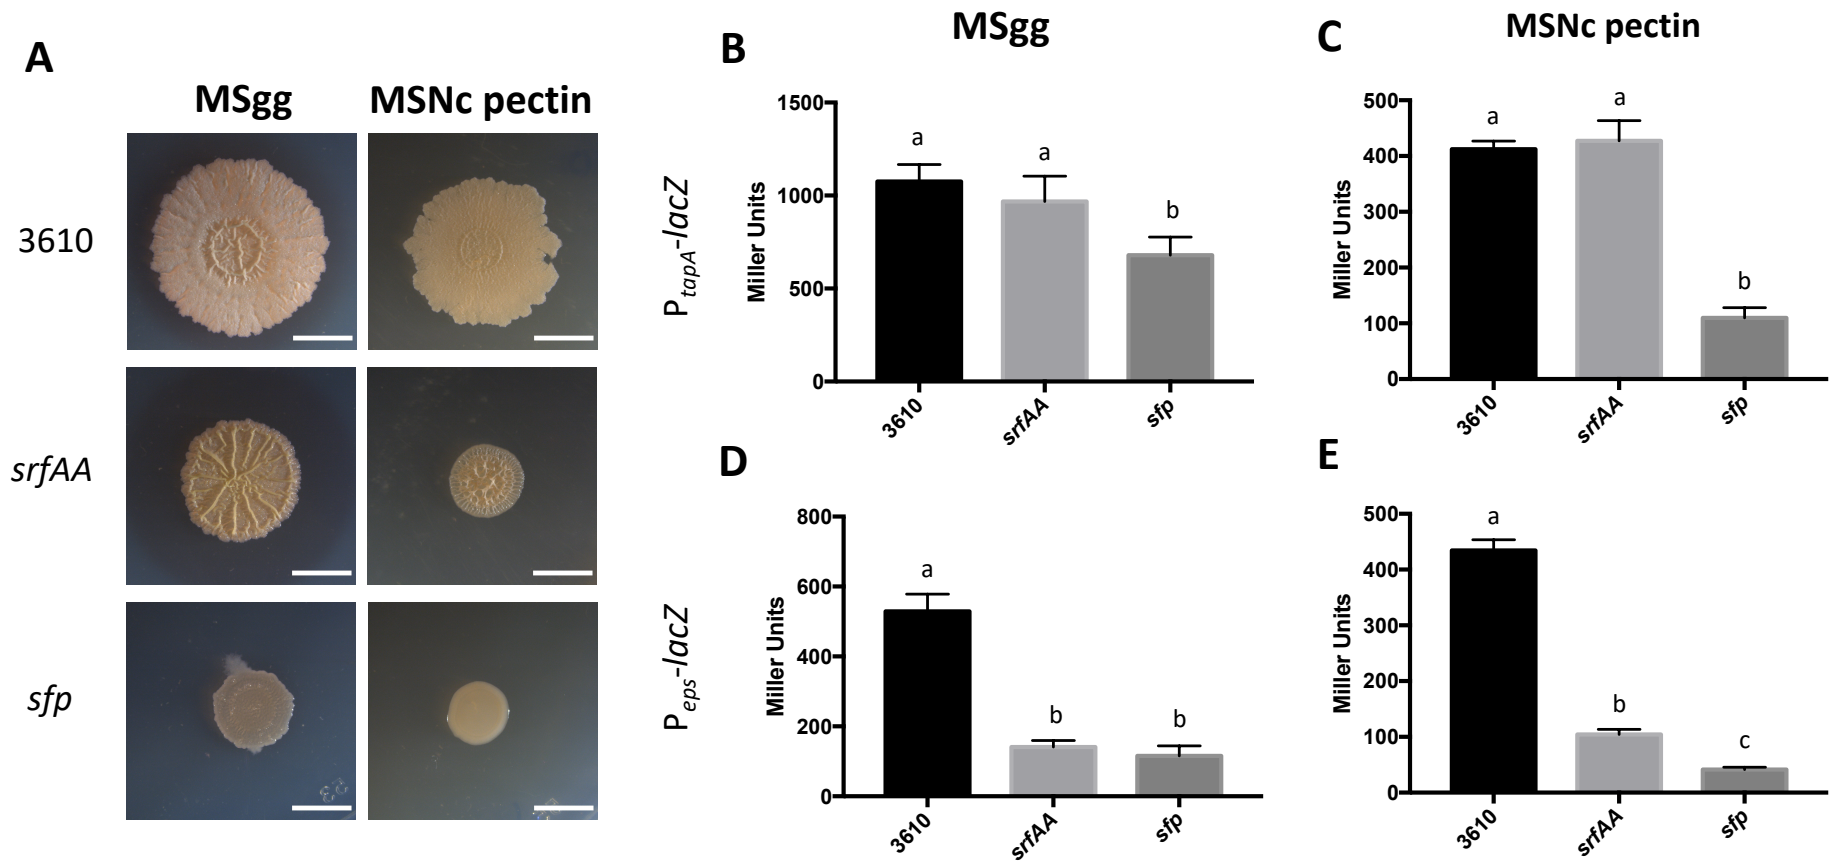

**Figure 2.** *srfAA* or *sfp* influence colony formation. (A) Top-down view of colonies incubated for 72 h at 30 °C on solid MSgg or MSNc + pectin. Results are representative of three experiments. Scale bar are 5 mm. (B-D)  $\beta$ -galactosidase activities of WT (3610), *srfAA* or *sfp* mutant harbouring the  $P_{tapA}$ -*lacZ* reporter (B and C) or the  $P_{eps}$ -*lacZ* reporter (D and E). Cells were grown on solid MSgg (B and D) or MSNc + pectin (C and E) for 20 hours. Values represent the mean of six technical replicates, and the experiments are representative of at least three independent biological replicates. Error bars represent standard deviation, and letters represent =  $P < 0.05$ .

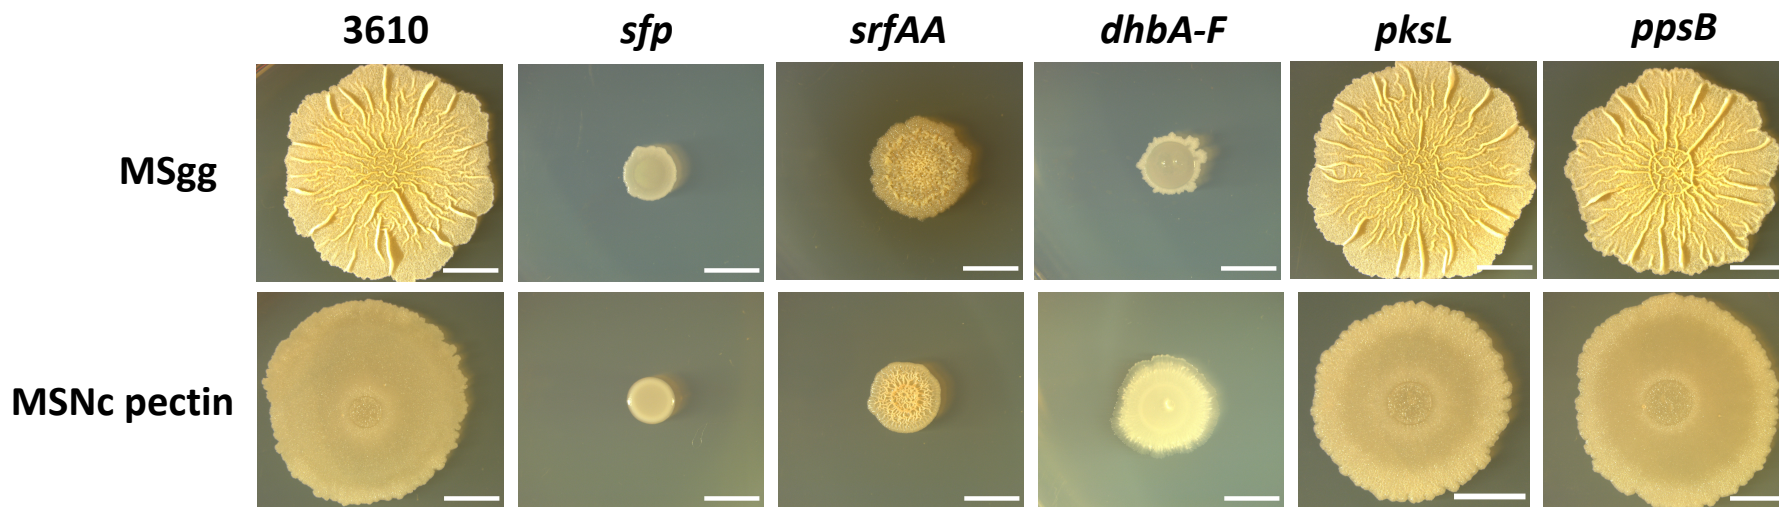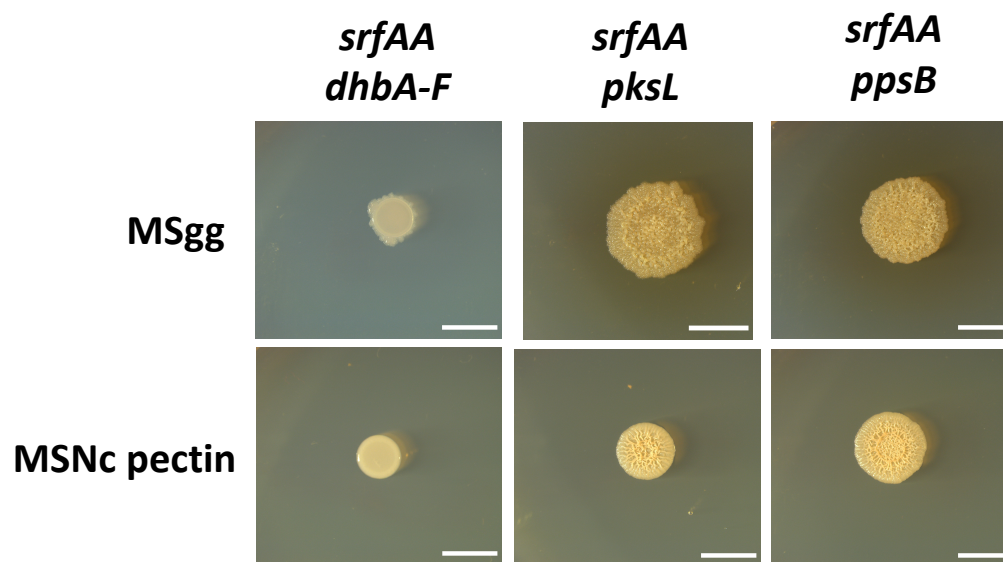

**Fig S2.** Impact of NRPs mutations on colony complexity. Top-down view of colonies incubated for 72 h at 30 °C on solid MSgg or MSNc + pectin. Results are representative of at least two experiments. Scale bars are 5 mm.

272  
273 Colony morphology results on solid media clearly show that *srfAA* and *sfp* deletion lead  
274 to phenotypes, indicating that in the latter absence of other molecule(s) synthesized via  
275 NRP machinery also impacts biofilm formation. Thus, we examined deletion mutants for  
276 bacillibactin (*dhbA-F*), plipastatin (*ppsB*) and bacillaene (*pksL*) (Fig. S2). The mutant  
277 defective for *B. subtilis* siderophore bacillibactin showed small, almost featureless  
278 colonies on both media, suggesting an important role for iron-acquisition molecules in this  
279 process. The double *srfAA dhbA-F* deletion recapitulated the *sfp* phenotype, suggesting  
280 that on solid media, both molecules are required for robust biofilm formation.

281  
282 *3.3 Surfactin is not required for root colonization by B. subtilis*  
283 In a natural environment, surfactin production is triggered by contact with plant roots few  
284 hours before biofilm formation [36]. Thus, we evaluated the importance of surfactin for  
285 root colonization of *A. thaliana* seedlings, using the system described in [34]. *B. subtilis*  
286 root colonization was monitored using a  $P_{tapA}$ -*yfp* reporter, allowing us to identify cells  
287 actively forming a biofilm on roots. Since absence of surfactin might only delay, instead of  
288 inhibit, root colonization, different time points after inoculation were examined. As shown  
289 in Fig. 3A, there was no apparent difference in the root colonization patterns and  
290 capacities of WT and *srfAA* cells. We validated these observations by imaging whole roots  
291 and determining the ratio of YFP expression/root area, which gives us a quantitative  
292 measurement of colonization. Indeed, while colonization somewhat varied from one  
293 seedling to another, overall there was no significant difference between WT and *srfAA*  
294 root colonization at any time points.

295



356  
357 **Table S2. Point mutations detected only in SSB46 (*srfAA::erm*)** Positions are  
358 indicated in reference to the genome of 3610 (NCBI Gene Bank sequence CP020102.1)

| <b>Position</b> | <b>Coding region change</b>        | <b>Amino-acid change</b> | <b>Gene</b> |
|-----------------|------------------------------------|--------------------------|-------------|
| 251310          | deletion of CT and insertion of TA | Leu430Tyr                | <i>ybfO</i> |
| 284231          | A to C                             | Lys59Asn                 | <i>phoD</i> |
| 312530          | Insertion of G                     | Glu110fs                 | <i>yceC</i> |
| 319949          | C to T                             |                          | <i>yceJ</i> |
| 353100          | deletion of AGCAGCTGATCG           | Ile70_Leu73del           | <i>ycgT</i> |
| 1705268         | G to T                             |                          | <i>fliP</i> |

359

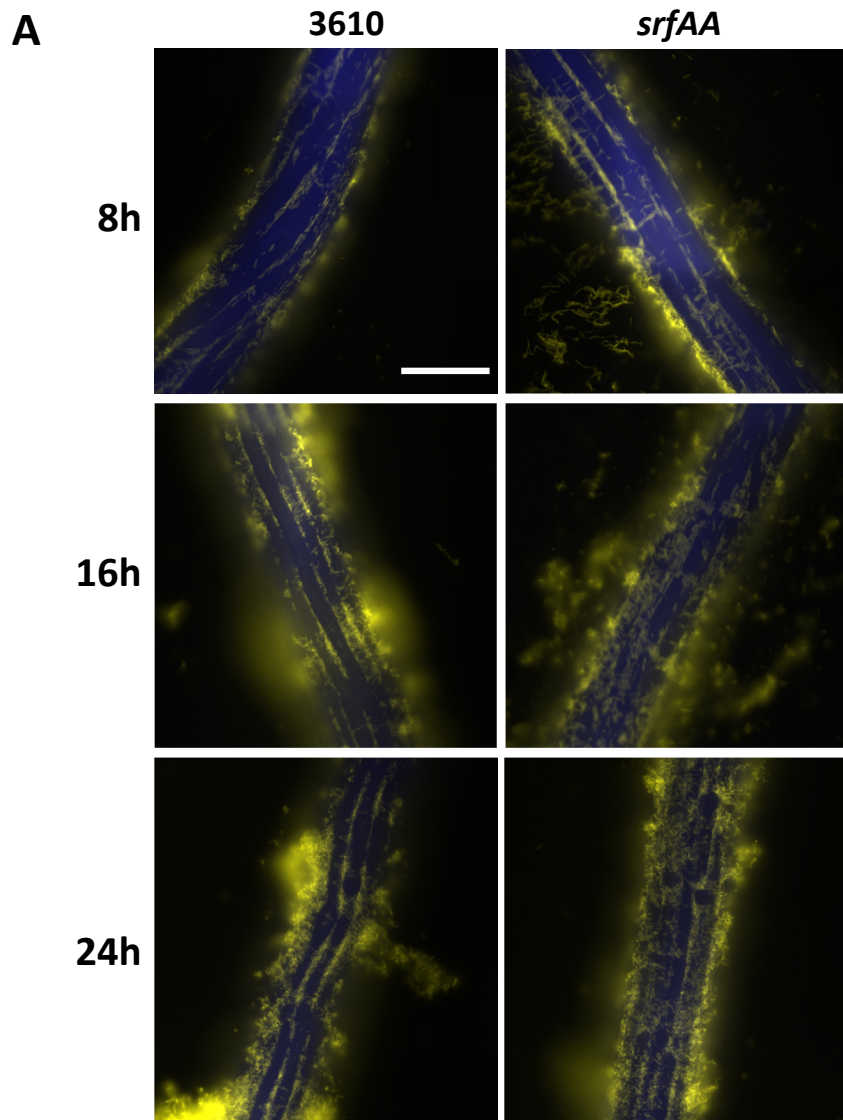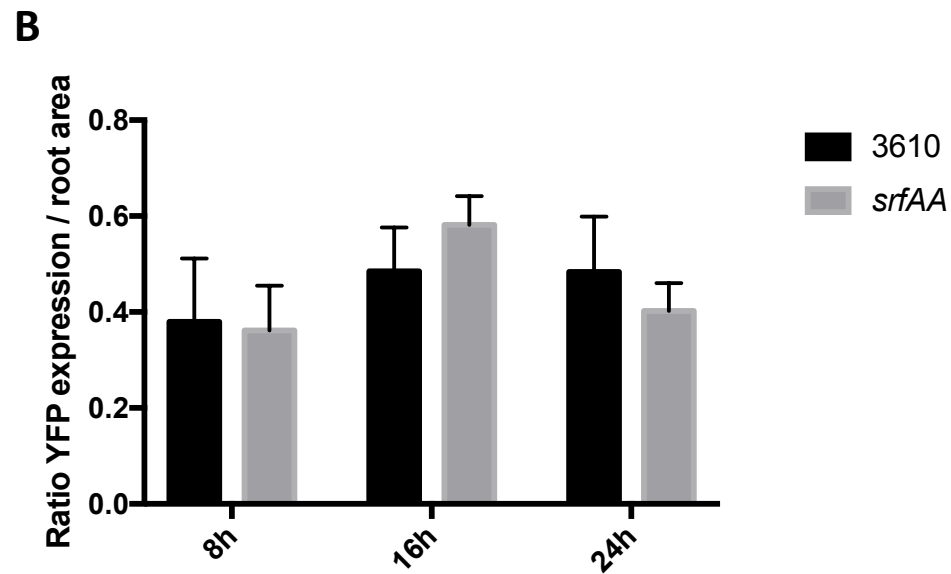

**Figure 3.** Surfactin is not required for root colonization. (A) 3610 cells harbouring  $P_{tapA}$ -*yfp* co-incubated with *A. thaliana* seedlings and imaged at 8, 16 and 24 h post-inoculation. Shown are overlays of fluorescence (false-colored green for YFP, and blue for CFP filter - which represents the autofluorescence of roots). Pictures are representative of 12 independent roots. Scale bar is 100  $\mu$ m for all images. (B) The entire root was imaged at 20 $\times$ , and numbers of fluorescent pixels was counted and then divided by the root's area (also measured in pixel), allowing quantification of biofilm-forming cells present on the root. For each strain, the bar represents the mean and standard deviation of at least four technical replicates; experiment is representative of three independent biological replicates. There was no statistical difference between 3610 and *srfAA* in the various conditions.

296 *3.4 Surfactin is dispensable for pellicle and plant-associated biofilm formation in recent*  
297 *soil B. subtilis isolates*

298 To address the generality of lack of surfactin production on pellicle formation ability, we  
299 tested pellicle biofilm development of 6 newly isolated *B. subtilis* strains recovered from  
300 soil samples. As the essentiality of surfactin production for pellicle development has been  
301 demonstrated on MOLP medium for *B. amyloliquefaciens* (previously identified as *B.*  
302 *subtilis*) UMAF6614 [24], pellicle formation was followed both on MSgg and MOLP liquid  
303 media that revealed no observable difference between wild-type and their surfactin mutant  
304 derivatives (Fig. 4). Additionally, plant colonization was indistinguishable between the  
305 wild-type and *srfAC::spec* strains (Fig. 4). Finally, to demonstrate the surfactin production  
306 ability of these new *B. subtilis* strains, the isolates were inoculated to MSgg medium and  
307 UHPLC-HRMS analysis was performed on isopropanol:ethyl acetate extracts of the agar  
308 medium below the colonies. Chemical analysis of the extract along with a standard  
309 demonstrated that each and every isolates produced surfactin, but not their *srfAC::spec*  
310 derivatives (Fig. S3).

311

312 **4. Discussion**

313 The promiscuous role of secondary metabolites to function as info chemicals has been  
314 previously proposed [38–40]. The *B. subtilis* produced surfactin has been reported to lead  
315 to induction of biofilm development under non-biofilm inducing conditions [26]. Our results  
316 highlight that under biofilm inducing conditions, on liquid or solid biofilm-promoting MSgg  
317 and MSNg media, biofilm development of *B. subtilis* 3610 and other newly isolated strains  
318 does not require surfactin. Production of both matrix components actually appeared more  
319 efficient in MSNc pectin in absence of surfactin, which could be due to the metabolic

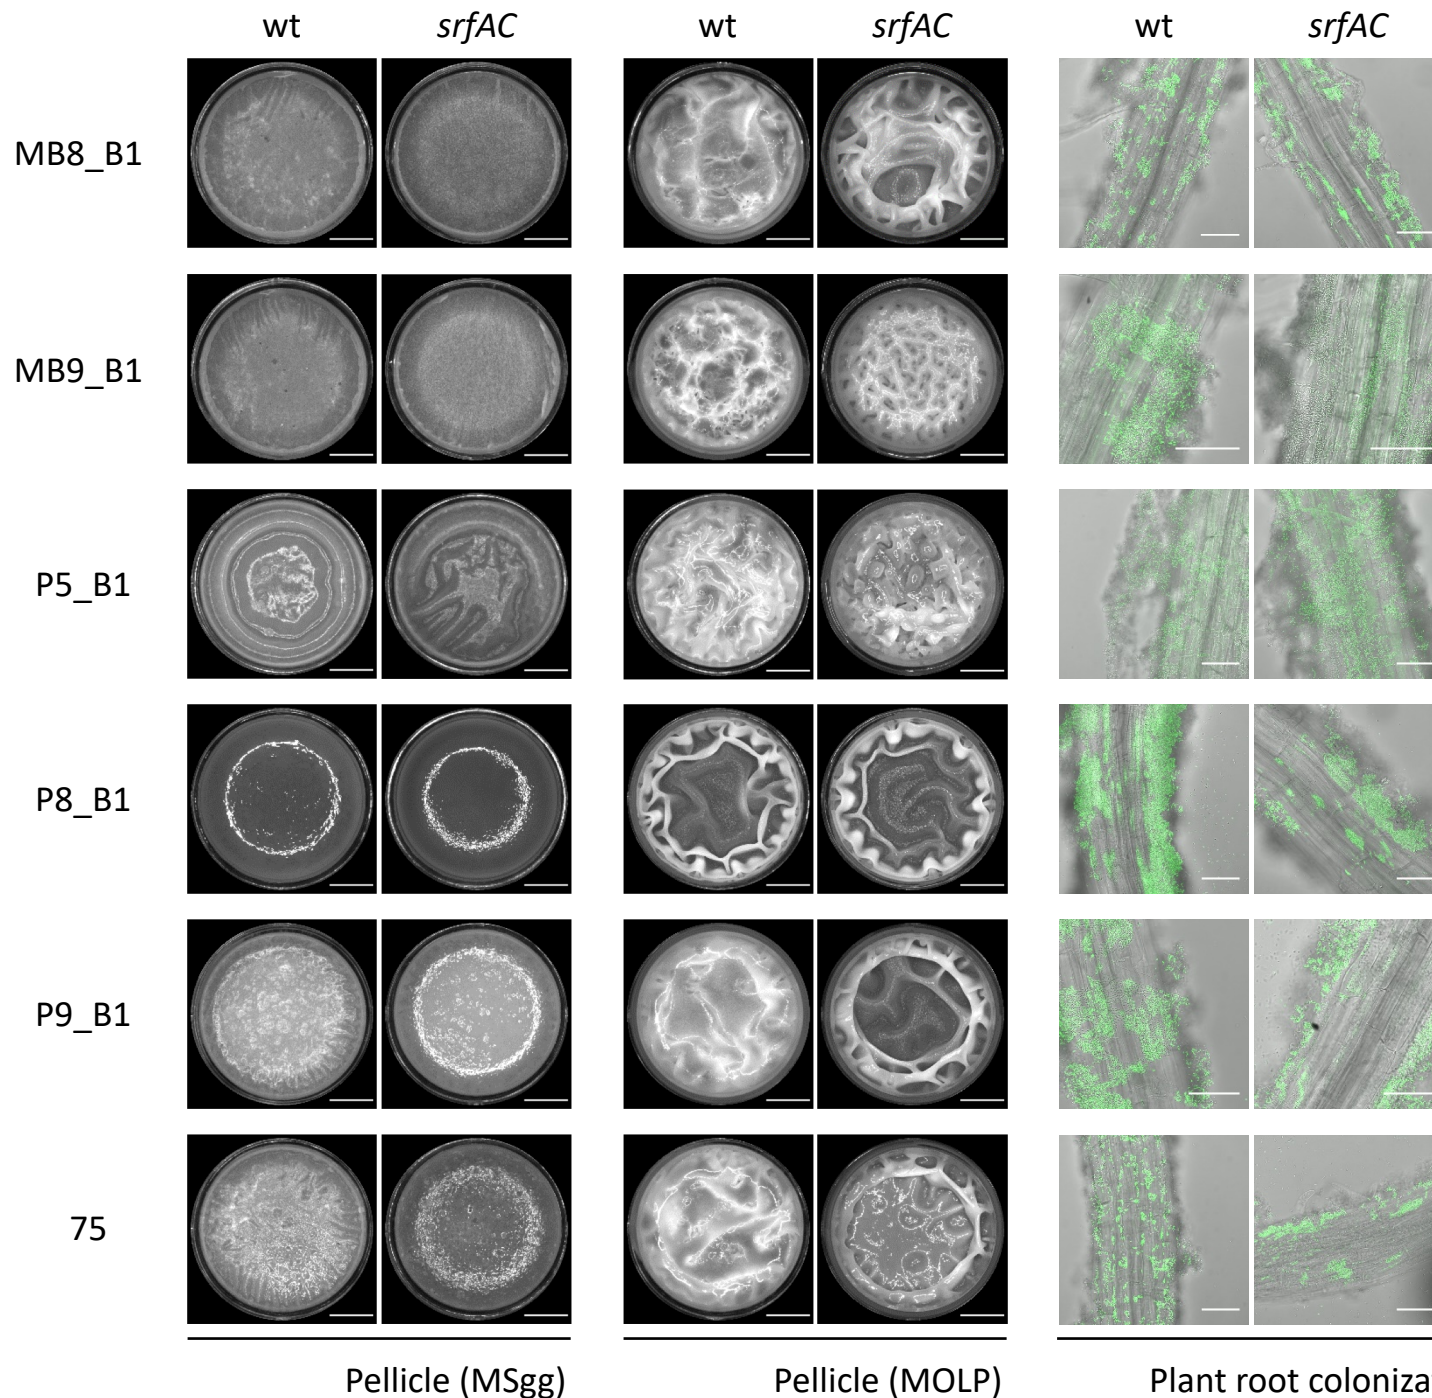

**Fig 4.** Pellicle (in MSgg and MOLP media) and root associated biofilms of newly isolated *B. subtilis* strains (wt columns) and their respective surfactin mutants (*srfAC* columns). Scale bars indicate 4 mm and 50  $\mu$ m for pellicle and root colonization images, respectively. Pellicle assays were performed with non-labeled strains, while plant colonization was followed using constitutively expressed GFP from  $P_{hyperspank}$ .

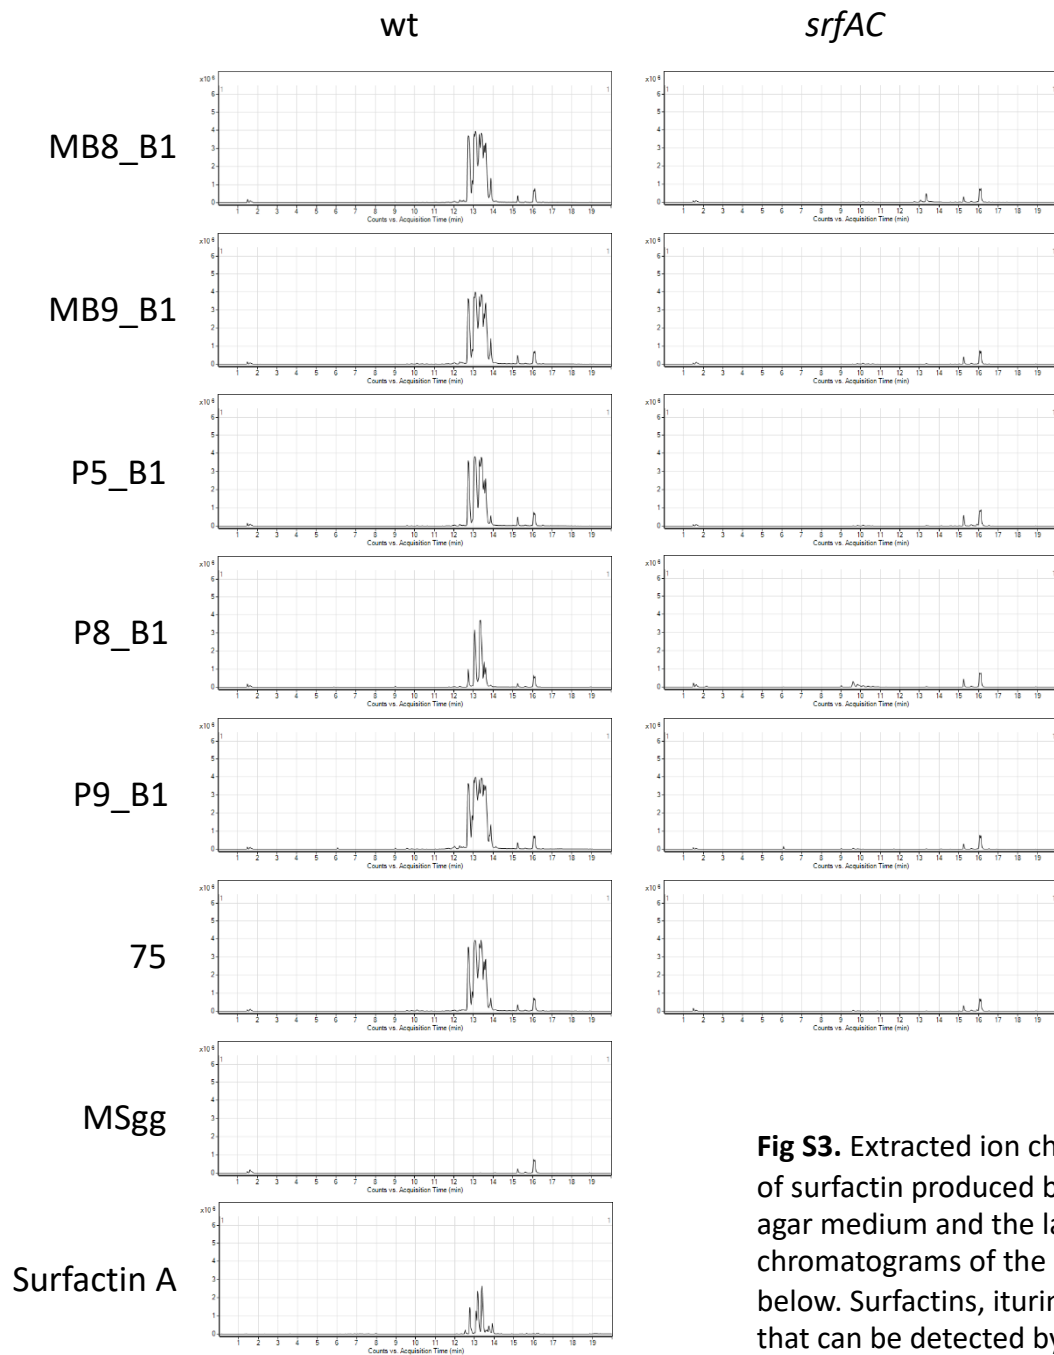

**Fig S3.** Extracted ion chromatograms ( $m/z$  1000–2000) showing the presence of surfactin produced by the newly isolated *B. subtilis* strains grown on MSgg agar medium and the lack of surfactin production in the *srfAC* derivatives. The chromatograms of the MSgg medium and the surfactin standard are shown below. Surfactins, iturins and fengycins are all in the  $m/z$  range 1000–2000 that can be detected by ESI–MS [45,46].



320 burden of producing an important NRPs [41,42]. In solid media, *srfAA* and *sfp* mutants  
321 display strikingly different phenotypes than WT. In both cases, colony diameter is smaller,  
322 stressing the need for surfactin to disperse on a surface [17,18]. Intriguingly, absence of  
323 surfactin had a stronger impact on *eps* than on *tapA* transcription, suggesting that surfactin  
324 and/or colony spreading might be involved in regulating exopolysaccharides production  
325 on solid surface. This regulation would be independent from SinR and AbrB, which act  
326 identically on both operons [43].

327  
328 Similarly to pellicle biofilm formation in liquid media, various *srfA* mutants colonize plant  
329 roots with an efficacy identical to WT cells. Surfactin production is stimulated by plant  
330 polysaccharides such as pectin, as is biofilm formation [34,36]. Thus, our observations  
331 suggest that while surfactin production precedes biofilm formation upon contact between  
332 cells and roots, both processes are somewhat independent. They also would have  
333 independent roles, biofilms favouring root attachment and surfactin production, triggering  
334 the induced systemic resistance.

335  
336 Our results show that for *B. subtilis*, surfactin production is not required for robust biofilm  
337 formation, which is in contradiction with many reports for surfactin requirement in various  
338 *Bacilli* [23,24,44]. In many of these reports however, the species or the strain examined  
339 also produce an iturin, bacillomycin, which is not the case for *B. subtilis* 3610 or the newly  
340 isolated *B. subtilis* strains [30]. Of note, Luo *et al.* showed that a *srf* mutant of *Bacillus spp.*  
341 916 produces weaker pellicles in liquid medium, and flat colonies on solid MSgg. However,  
342 in this case deletion of *srf* also strongly impairs production of bacillomycin L, which is also  
343 required for strong biofilm establishment and rice leaves colonization by *Bacillus spp.* 916

344 [44]. Thus, requirement of surfactin for biofilm formation and plant colonization is likely  
345 species- or strain-specific in *Bacillus*, and might depend on the presence of iturin  
346 production in these strains. Nevertheless, the importance of surfactin production by PGPR  
347 strains of *Bacilli* is primarily for the anti-microbial potential and systemic resistance  
348 induction by this multi-functional secondary metabolite.

349 **Acknowledgement**

350 This project was supported by the Danish National Research Foundation (DNRF137) for  
351 the Center for Microbial Secondary Metabolites (to H.T.K, M.W., and Á.T.K.), and by a  
352 Discovery Grant and Early Career Researcher Supplement from the Natural Sciences and  
353 Engineering Council of Canada (NSERC RGPIN-2014-04628 to P.B.B.).



360 **References**

- 361 [1] Fan B, Blom J, Klenk H-P, Borriss R. *Bacillus amyloliquefaciens*, *Bacillus*  
362 *velezensis*, and *Bacillus siamensis* Form an “Operational Group B.  
363 amyloliquefaciens” within the *B. subtilis* Species Complex. *Front Microbiol*  
364 2017;8:22. doi:10.3389/fmicb.2017.00022.
- 365 [2] Pérez-García A, Romero D, de Vicente A. Plant protection and growth stimulation  
366 by microorganisms: biotechnological applications of Bacilli in agriculture. *Curr*  
367 *Opin Biotechnol* 2011;22:187–93. doi:10.1016/j.copbio.2010.12.003.
- 368 [3] Aloo BN, Makumba BA, Mbega ER. The potential of Bacilli rhizobacteria for  
369 sustainable crop production and environmental sustainability. *Microbiol Res*  
370 2019;219:26–39. doi:10.1016/j.micres.2018.10.011.
- 371 [4] Borriss R. Use of plant-associated *Bacillus* strains as biofertilizers and biocontrol  
372 agents in agriculture. In: Maheshwari DK, editor. *Bact. Agrobiol. Plant Growth*  
373 *Responses*, Springer; 2011, p. 41–76.
- 374 [5] Ongena M, Jacques P. *Bacillus* lipopeptides: versatile weapons for plant disease  
375 biocontrol. *Trends Microbiol* 2008;16:115–25. doi:10.1016/j.tim.2007.12.009.
- 376 [6] Stein T. *Bacillus subtilis* antibiotics: structures, syntheses and specific functions.  
377 *Mol Microbiol* 2005;56:845–57. doi:10.1111/j.1365-2958.2005.04587.x.
- 378 [7] Straight PD, Fischbach MA, Walsh CT, Rudner DZ, Kolter R. A singular enzymatic  
379 megacomplex from *Bacillus subtilis*. *Proc Natl Acad Sci U S A* 2007;104:305–10.  
380 doi:10.1073/pnas.0609073103.
- 381 [8] Tosato V, Albertini AM, Zotti M, Sonda S, Bruschi C V. Sequence completion,  
382 identification and definition of the fengycin operon in *Bacillus subtilis* 168.  
383 *Microbiology* 1997;143:3443–50. doi:10.1099/00221287-143-11-3443.

- 384 [9] Rizzi A, Roy S, Bellenger J-P, Beauregard PB. Iron Homeostasis in *Bacillus*  
385 *subtilis* Requires Siderophore Production and Biofilm Formation. *Appl Environ*  
386 *Microbiol* 2018;85:1–10. doi:10.1128/AEM.02439-18.
- 387 [10] Kraas FI, Helmetag V, Wittmann M, Strieker M, Marahiel MA. Functional  
388 dissection of surfactin synthetase initiation module reveals insights into the  
389 mechanism of lipoinitiation. *Chem Biol* 2010;17:872–80.  
390 doi:10.1016/j.chembiol.2010.06.015.
- 391 [11] Jourdan E, Henry G, Duby F, Dommes J, Barthélemy JP, Thonart P, *et al.* Insights  
392 into the Defense-Related Events Occurring in Plant Cells Following Perception of  
393 Surfactin-Type Lipopeptide from *Bacillus subtilis*. *Mol Plant-Microbe Interact*  
394 2009;22:456–68. doi:10.1094/MPMI-22-4-0456.
- 395 [12] Bartal A, Vigneshwari A, Bóka B, Vörös M, Takács I, Kredics L, *et al.* Effects of  
396 Different Cultivation Parameters on the Production of Surfactin Variants by a  
397 *Bacillus subtilis* Strain. *Molecules* 2018;23:2675. doi:10.3390/molecules23102675.
- 398 [13] Nihorimbere V, Cawoy H, Seyer A, Brunelle A, Thonart P, Ongena M. Impact of  
399 rhizosphere factors on cyclic lipopeptide signature from the plant beneficial strain  
400 *Bacillus amyloliquefaciens* S499. *FEMS Microbiol Ecol* 2012;79:176–91.  
401 doi:10.1111/j.1574-6941.2011.01208.x.
- 402 [14] Shaligram NS, Singhal RS. Surfactin -a review on biosynthesis, fermentation,  
403 purification and applications. *Food Technol Biotechnol* 2010;48:119–34.  
404 doi:10.1093/jxb/erf089.
- 405 [15] Kearns DB, Losick R. Swarming motility in undomesticated *Bacillus subtilis*. *Mol*  
406 *Microbiol* 2004;49:581–90. doi:10.1046/j.1365-2958.2003.03584.x.
- 407 [16] Kovács ÁT, Grau R, Pollitt EJJ. Surfing of bacterial droplets: *Bacillus subtilis*

- 408 sliding revisited. Proc Natl Acad Sci U S A 2017;114:E8802.  
409 doi:10.1073/pnas.1710371114.
- 410 [17] Grau RR, Oña P De, Kunert M, Leñini C, Gallegos-monterrosa R, Mhatre E, *et al.*  
411 A duo of potassium-responsive histidine kinases govern the multicellular destiny of  
412 *Bacillus subtilis*. MBio 2015;6:1–16. doi:10.1128/mBio.00581-15.Editor.
- 413 [18] van Gestel J, Vlamakis H, Kolter R. From cell differentiation to cell collectives:  
414 *Bacillus subtilis* uses division of labor to migrate. PLOS Biol 2015;13:e1002141.  
415 doi:10.1371/journal.pbio.1002141.
- 416 [19] Bais HP, Fall R, Vivanco JM. Biocontrol of *Bacillus subtilis* against infection of  
417 *Arabidopsis* roots by *Pseudomonas syringae* is facilitated by biofilm formation and  
418 surfactin production. Plant Physiol 2004;134:307–19.  
419 doi:10.1104/pp.103.028712.zobacterium.
- 420 [20] Ongena M, Jourdan E, Adam A, Paquot M, Brans A, Joris B, *et al.* Brief report  
421 Surfactin and fengycin lipopeptides of *Bacillus subtilis* as elicitors of induced  
422 systemic resistance in plants 2007;9:1084–90. doi:10.1111/j.1462-  
423 2920.2006.01202.x.
- 424 [21] García-Gutiérrez L, Zerriouh H, Romero D, Cubero J, de Vicente A, Pérez-García  
425 A. The antagonistic strain *Bacillus subtilis* UMAF6639 also confers protection to  
426 melon plants against cucurbit powdery mildew by activation of jasmonate- and  
427 salicylic acid-dependent defence responses. Microb Biotechnol 2013;6:264–74.  
428 doi:10.1111/1751-7915.12028.
- 429 [22] Farace G, Fernandez O, Jacquens L, Coutte F, Krier F, Jacques P, *et al.* Cyclic  
430 lipopeptides from *Bacillus subtilis* activate distinct patterns of defence responses  
431 in grapevine. Mol Plant Pathol 2015;16:177–87. doi:10.1111/mpp.12170.

- 432 [23] Chen XH, Koumoutsi A, Scholz R, Schneider K, Vater J, Süssmuth R, *et al.*  
433 Genome analysis of *Bacillus amyloliquefaciens* FZB42 reveals its potential for  
434 biocontrol of plant pathogens. *J Biotechnol* 2009;140:27–37.  
435 doi:10.1016/j.jbiotec.2008.10.011.
- 436 [24] Zeriouh H, de Vicente A, Pérez-García A, Romero D. Surfactin triggers biofilm  
437 formation of *Bacillus subtilis* in melon phylloplane and contributes to the biocontrol  
438 activity. *Environ Microbiol* 2014;16:2196–211. doi:10.1111/1462-2920.12271.
- 439 [25] Chowdhury SP, Uhl J, Grosch R, Alquéres S, Pittroff S, Dietel K, *et al.* Cyclic  
440 lipopeptides of *Bacillus amyloliquefaciens* subsp. *plantarum* colonizing the lettuce  
441 rhizosphere enhance plant defence responses towards the bottom rot pathogen  
442 *Rhizoctonia solani*. *Mol Plant Microbe Interact* 2015;28:17–8. doi:10.1094/MPMI-  
443 03-15-0066-R
- 444 [26] López D, Fischbach MA, Chu F, Losick R, Kolter R. Structurally diverse natural  
445 products that cause potassium leakage trigger multicellularity in *Bacillus subtilis*.  
446 *Proc Natl Acad Sci U S A* 2009;106:280–5. doi:10.1073/pnas.0810940106.
- 447 [27] Oslizlo A, Stefanic P, Vatovec S, Beigot Glaser S, Rupnik M, Mandic-Mulec I.  
448 Exploring ComQXPA quorum-sensing diversity and biocontrol potential of *Bacillus*  
449 spp. isolates from tomato rhizoplane. *Microb Biotechnol* 2015;8:527–40.  
450 doi:10.1111/1751-7915.12258.
- 451 [28] Branda SS, González-Pastor JE, Ben-Yehuda S, Losick R, Kolter R. Fruiting body  
452 formation by *Bacillus subtilis*. *Proc Natl Acad Sci U S A* 2001;98:11621–6.  
453 doi:10.1073/pnas.191384198.
- 454 [29] Gallegos-Monterrosa R, Mhatre E, Kovács ÁT. Specific *Bacillus subtilis* 168  
455 variants form biofilms on nutrient-rich medium. *Microbiology* 2016;162:1922–32.

- 456 doi:10.1099/mic.0.000371.
- 457 [30] Kiesewalter H, Lozano-Andrade C, Maróti G, Snyder D, Cooper V, Jørgensen T,  
458 *et al.* Complete genome sequence of 13 *Bacillus subtilis* soil isolates to study  
459 secondary metabolite diversity. Submitted to Microb Resour Announc 2019.
- 460 [31] Chen R, Guttenplan SB, Blair KM, Kearns DB. Role of the sigmaD-dependent  
461 autolysins in *Bacillus subtilis* population heterogeneity. J Bacteriol  
462 2009;191:5775–84. doi:10.1128/JB.00521-09.
- 463 [32] van Gestel J, Weissing FJ, Kuipers OP, Kovács ÁT. Density of founder cells  
464 affects spatial pattern formation and cooperation in *Bacillus subtilis* biofilms. ISME  
465 J 2014;8:2069–79. doi:10.1038/ismej.2014.52.
- 466 [33] Ahimou F, Jacques P, Deleu M. Surfactin and iturin A effects on *Bacillus subtilis*  
467 surface hydrophobicity. Enzyme Microb Technol 2000;27:749–54.  
468 doi:10.1016/S0141-0229(00)00295-7.
- 469 [34] Beauregard PB, Chai Y, Vlamakis H, Losick R, Kolter R. *Bacillus subtilis* biofilm  
470 induction by plant polysaccharides. Proc Natl Acad Sci U S A 2013;110:E1621-30.  
471 doi:10.1073/pnas.1218984110.
- 472 [35] Lamprecht MR, Sabatini DM, Carpenter AE. CellProfiler™: Free, versatile  
473 software for automated biological image analysis. Biotechniques 2007;42:71–5.  
474 doi:10.2144/000112257.
- 475 [36] Debois D, Fernandez O, Franzil L, Jourdan E, de Brogniez A, Willems L, *et al.*  
476 Plant polysaccharides initiate underground crosstalk with bacilli by inducing  
477 synthesis of the immunogenic lipopeptide surfactin. Environ Microbiol Rep  
478 2015;7:570–82. doi:10.1111/1758-2229.12286.
- 479 [37] Ghelardi E, Salvetti S, Ceragioli M, Gueye S a, Celandroni F, Senesi S.

- 480 Contribution of surfactin and SwrA to flagellin expression, swimming, and surface  
481 motility in *Bacillus subtilis*. *Appl Environ Microbiol* 2012;78:6540–4.  
482 doi:10.1128/AEM.01341-12.
- 483 [38] Davies J. What are antibiotics? Archaic functions for modern activities. *Mol*  
484 *Microbiol* 1990;4:1227–32.
- 485 [39] Traxler MF, Kolter R. Natural products in soil microbe interactions and evolution.  
486 *Nat Prod Rep* 2015;32:956–70. doi:10.1039/C5NP00013K.
- 487 [40] Romero D, Traxler MF, López D, Kolter R. Antibiotics as signal molecules. *Chem*  
488 *Rev* 2011;111:5492–505. doi:10.1021/cr2000509.
- 489 [41] Oslizlo A, Stefanic P, Dogsa I, Mandic-Mulec I. Private link between signal and  
490 response in *Bacillus subtilis* quorum sensing. *Proc Natl Acad Sci U S A*  
491 2014;111:1586–91. doi:10.1073/pnas.1316283111.
- 492 [42] Pollak S, Omer-Bendori S, Even-Tov E, Lipsman V, Bareia T, Ben-Zion I, *et al.*  
493 Facultative cheating supports the coexistence of diverse quorum-sensing alleles.  
494 *Proc Natl Acad Sci U S A* 2016;113:2152–7. doi:10.1073/pnas.1520615113.
- 495 [43] Vlamakis H, Chai Y, Beaugregard PB, Losick R, Kolter R. Sticking together:  
496 building a biofilm the *Bacillus subtilis* way. *Nat Rev Microbiol* 2013;11:157–68.  
497 doi:10.1038/nrmicro2960.
- 498 [44] Luo C, Zhou H, Zou J, Wang X, Zhang R, Xiang Y, *et al.* Bacillomycin L and  
499 surfactin contribute synergistically to the phenotypic features of *Bacillus subtilis*  
500 916 and the biocontrol of rice sheath blight induced by *Rhizoctonia solani*. *Appl*  
501 *Microbiol Biotechnol* 2015;99:1897–910. doi:10.1007/s00253-014-6195-4.
- 502 [45] Ma Y, Kong Q, Qin C, Chen Y, Chen Y, Lv R, *et al.* Identification of lipopeptides in  
503 *Bacillus megaterium* by two-step ultrafiltration and LC–ESI–MS/MS. *AMB Express*

- 504 2016;6. doi:10.1186/s13568-016-0252-6.
- 505 [46] Yang H, Li X, Li X, Yu H, Shen Z. Identification of lipopeptide isoforms by MALDI-  
506 TOF-MS/MS based on the simultaneous purification of iturin, fengycin, and  
507 surfactin by RP-HPLC. *Anal Bioanal Chem* 2015;407:2529–42.  
508 doi:10.1007/s00216-015-8486-8.
- 509 [47] Koo B-M, Kritikos G, Farelli JD, Todor H, Tong K, Kimsey H, *et al.* Construction  
510 and Analysis of Two Genome-Scale Deletion Libraries for *Bacillus subtilis*. *Cell*  
511 *Syst* 2017;0:1–15. doi:10.1016/j.cels.2016.12.013.
- 512 [48] Vlamakis H, Aguilar C, Losick R, Kolter R. Control of cell fate by the formation of  
513 an architecturally complex bacterial community. *Genes Dev* 2008;22:945–53.  
514 doi:10.1101/gad.1645008.
- 515
